# Supplementary material
Source: PubMed Central journal article supplement (PMC5556828)
Supplement: JCOPDF-2-321-s001.pdf [file JCOPDF-2-321-s001.pdf]

**Figure S1. Example of Electronic Search Strings  
Embase Search**

| #  | Searches                                                                                                                      | Results   |
|----|-------------------------------------------------------------------------------------------------------------------------------|-----------|
| 1  | chronic obstructive pulmonary disease.mp. or exp chronic obstructive lung disease/                                            | 68,878    |
| 2  | chronic obstructive lung disease.mp.                                                                                          | 65,527    |
| 3  | chronic obstructive respiratory disease.mp.                                                                                   | 119       |
| 4  | copd.mp.                                                                                                                      | 33,438    |
| 5  | chronic obstructive airway disease.mp.                                                                                        | 378       |
| 6  | chronic bronchitis.mp. or exp chronic bronchitis/                                                                             | 16,146    |
| 7  | lung emphysema.mp. or exp lung emphysema/                                                                                     | 19,606    |
| 8  | chronic obstructive airway disease.mp.                                                                                        | 378       |
| 9  | chronic airflow obstruction.mp.                                                                                               | 627       |
| 10 | 1 or 2 or 3 or 4 or 5 or 6 or 7 or 8 or 9                                                                                     | 103,379   |
| 11 | exp cardiopulmonary exercise test/ or exp exercise tolerance/ or exp aerobic exercise/ or exp exercise/ or exp exercise test/ | 228,181   |
| 12 | (exercise or exercise capacity or exercise tolerance).mp.                                                                     | 302,038   |
| 13 | (clinically important difference or mcid or clinically meaningful).mp.                                                        | 6903      |
| 14 | 11 or 12 or 13                                                                                                                | 311,378   |
| 15 | ('6 minute walk' or '6m walk' or '6 m walk' or 'six minute walk' or '6MWD').mp.                                               | 4644      |
| 16 | ('12 minute walk' or '12m walk' or '12 m walk' or 'twelve minute walk' or '12MWD').mp.                                        | 90        |
| 17 | ('shuttle walk' or 'shuttle walking' or 'iswt' or '10 metre walking' or '10 meter walking' or 'ESWT').mp.                     | 1010      |
| 18 | cycle ergometer.mp. or exp bicycle ergometer/                                                                                 | 5540      |
| 19 | bicycle ergometry.mp. or exp bicycle ergometry/                                                                               | 6840      |
| 20 | (cycle ergometry or cycle ergometric or bicycle ergometric).mp.                                                               | 1721      |
| 21 | treadmill.mp. or exp treadmill/                                                                                               | 29,379    |
| 22 | (short physical performance battery or sppb).mp.                                                                              | 367       |
| 23 | 15 or 16 or 17 or 18 or 19 or 20 or 21 or 22                                                                                  | 45,996    |
| 24 | 10 and 14 and 23                                                                                                              | 1626      |
| 25 | (test or assessment or capacity).mp.                                                                                          | 3,225,394 |
| 24 | 10 and 14 and 23                                                                                                              | 1408      |
| 25 | (test or assessment or capacity).mp.                                                                                          | 1099      |
